# Supplementary material for: Dlx1/2 and Otp coordinate the production of hypothalamic GHRH- and AgRP-neurons
Source: PubMed Central journal article supplement (PMC5966420; doi:10.1038/s41467-018-04377-4), 2018-05-23
Supplement: 41467_2018_4377_MOESM2_ESM.pdf [file 41467_2018_4377_MOESM2_ESM.pdf]

## **Description of Additional Supplementary Files**

**File Name:** Supplementary Data 1

**Description:** Dlx1 ChIPseq peaks and their associated genes
